# Supplementary material for: Fabrication of Direct Compressible Tablets Containing Chatuphalathika Extract Obtained through Microwave-Assisted Extraction: An Optimization Approach
Source: MDPI journal article supplement (doi:10.3390/scipharm91020017), 2023-03-23
Supplement: s1 [file s1]

**Table S1.** Factors and responses of the Box-Behnken design for microwave-assisted extraction.

| Condition | Factors*       |                |                | Responses**    |                |                |                |                |                |                |                |
|-----------|----------------|----------------|----------------|----------------|----------------|----------------|----------------|----------------|----------------|----------------|----------------|
|           | X <sub>1</sub> | X <sub>2</sub> | X <sub>3</sub> | Y <sub>1</sub> | Y <sub>2</sub> | Y <sub>3</sub> | Y <sub>4</sub> | Y <sub>5</sub> | Y <sub>6</sub> | Y <sub>7</sub> | Y <sub>8</sub> |
| 1         | 300            | 10             | 2              | 19.1           | 365.18         | 3.71           | 0.85           | 4.13           | 4.85           | 10.01          | 18.15          |
| 2         | 600            | 10             | 2              | 17.2           | 345.51         | 3.94           | 1.08           | 4.52           | 4.39           | 7.22           | 26.36          |
| 3         | 300            | 30             | 2              | 29.9           | 389.69         | 4.07           | 0.98           | 5.19           | 5.75           | 9.14           | 24.37          |
| 4         | 600            | 30             | 2              | 32.8           | 377.15         | 3.45           | 1.02           | 6.34           | 6.78           | 8.21           | 15.47          |
| 5         | 300            | 20             | 1              | 19.5           | 345.63         | 4.25           | 1.08           | 4.35           | 6.02           | 16.82          | 16.13          |
| 6         | 600            | 20             | 1              | 25.5           | 300.54         | 4.01           | 1.16           | 5.56           | 6.87           | 9.60           | 16.08          |
| 7         | 300            | 20             | 3              | 27.3           | 384.27         | 3.80           | 1.16           | 6.30           | 6.24           | 7.70           | 15.97          |
| 8         | 600            | 20             | 3              | 34.2           | 400.54         | 3.25           | 1.20           | 7.09           | 7.29           | 14.00          | 15.59          |
| 9         | 450            | 10             | 1              | 19.1           | 351.16         | 4.60           | 1.05           | 4.26           | 5.59           | 37.28          | 16.37          |
| 10        | 450            | 30             | 1              | 20.7           | 356.47         | 4.77           | 1.15           | 4.84           | 6.20           | 16.56          | 16.43          |
| 11        | 450            | 10             | 3              | 28.4           | 431.73         | 4.53           | 1.08           | 5.58           | 6.09           | 10.50          | 16.8           |
| 12        | 450            | 30             | 3              | 34.6           | 407.55         | 3.30           | 1.16           | 7.02           | 7.07           | 9.64           | 15.66          |
| 13        | 450            | 20             | 2              | 27.1           | 386.87         | 4.41           | 1.07           | 5.69           | 5.88           | 7.65           | 16.3           |
| 14        | 450            | 20             | 2              | 22.5           | 376.25         | 4.72           | 1.05           | 4.76           | 4.21           | 9.77           | 16.57          |
| 15        | 450            | 20             | 2              | 28.5           | 398.62         | 4.52           | 1.10           | 5.90           | 5.71           | 8.94           | 16.56          |
| 16        | 450            | 20             | 2              | 28.8           | 423.14         | 4.51           | 1.14           | 6.42           | 6.78           | 9.68           | 16.01          |
| 17        | 450            | 20             | 2              | 30.6           | 411.73         | 5.05           | 1.11           | 5.92           | 6.48           | 7.74           | 16.66          |

\* X<sub>1</sub>, X<sub>2</sub>, and X<sub>3</sub> are the microwave power, the duration time, and the irradiation cycle, in the units of W, s, and cycle(s), respectively.

\*\* Y<sub>1</sub> to Y<sub>8</sub> are average values of extraction yield, total phenolic content (TPC), gallic acid content, corilagin content, chebulagic acid content, chebulinic acid content, IC<sub>50</sub> from DPPH assay, and IC<sub>50</sub> from FRAP assay, in the units of %, mg GAE/g extract, %, %, %, %, µg/mL, and µg/mL, respectively.

**Table S2.** Factors and responses of the Box-Behnken design for tablet fabrication.

| Formulation | Factors*       |                |                | Responses**    |                |                |                |
|-------------|----------------|----------------|----------------|----------------|----------------|----------------|----------------|
|             | X <sub>1</sub> | X <sub>2</sub> | X <sub>3</sub> | Y <sub>3</sub> | Y <sub>5</sub> | Y <sub>6</sub> | Y <sub>7</sub> |
| 1           | 1000           | 0              | 1              | 4.72           | 2.00           | 2.81           | 19.79          |
| 2           | 2000           | 0              | 1              | 4.10           | 6.66           | 0.16           | 352.63         |
| 3           | 1000           | 4              | 1              | 4.64           | 1.87           | 100.00         | 22.56          |
| 4           | 2000           | 4              | 1              | 4.10           | 6.68           | 0.18           | 403.85         |
| 5           | 1000           | 2              | 0.5            | 4.66           | 1.79           | 3.45           | 20.81          |
| 6           | 2000           | 2              | 0.5            | 4.11           | 5.40           | 0.27           | 176.57         |
| 7           | 1000           | 2              | 1.5            | 4.58           | 2.32           | 100.00         | 26.82          |
| 8           | 2000           | 2              | 1.5            | 3.90           | 10.98          | 0.11           | 650.56         |
| 9           | 1500           | 0              | 0.5            | 4.26           | 4.91           | 0.34           | 88.23          |
| 10          | 1500           | 4              | 0.5            | 4.25           | 4.26           | 0.91           | 93.65          |
| 11          | 1500           | 0              | 1.5            | 4.22           | 3.98           | 0.80           | 117.75         |
| 12          | 1500           | 4              | 1.5            | 4.26           | 3.80           | 100.00         | 97.26          |
| 13          | 1500           | 2              | 1              | 4.25           | 3.93           | 0.88           | 117.02         |
| 14          | 1500           | 2              | 1              | 4.25           | 3.91           | 1.66           | 54.50          |
| 15          | 1500           | 2              | 1              | 4.14           | 4.50           | 0.93           | 82.67          |

\* X<sub>1</sub>, X<sub>2</sub>, and X<sub>3</sub> are the compression force, the amount of sodium starch glycolate, and the amount of magnesium stearate, in the units of psi, %, and %, respectively.

\*\* Y<sub>3</sub>, Y<sub>5</sub>, Y<sub>6</sub>, and Y<sub>7</sub> are average values of tablet thickness, hardness, friability, and disintegration time, in the units of mm, kP, %, and s, respectively.

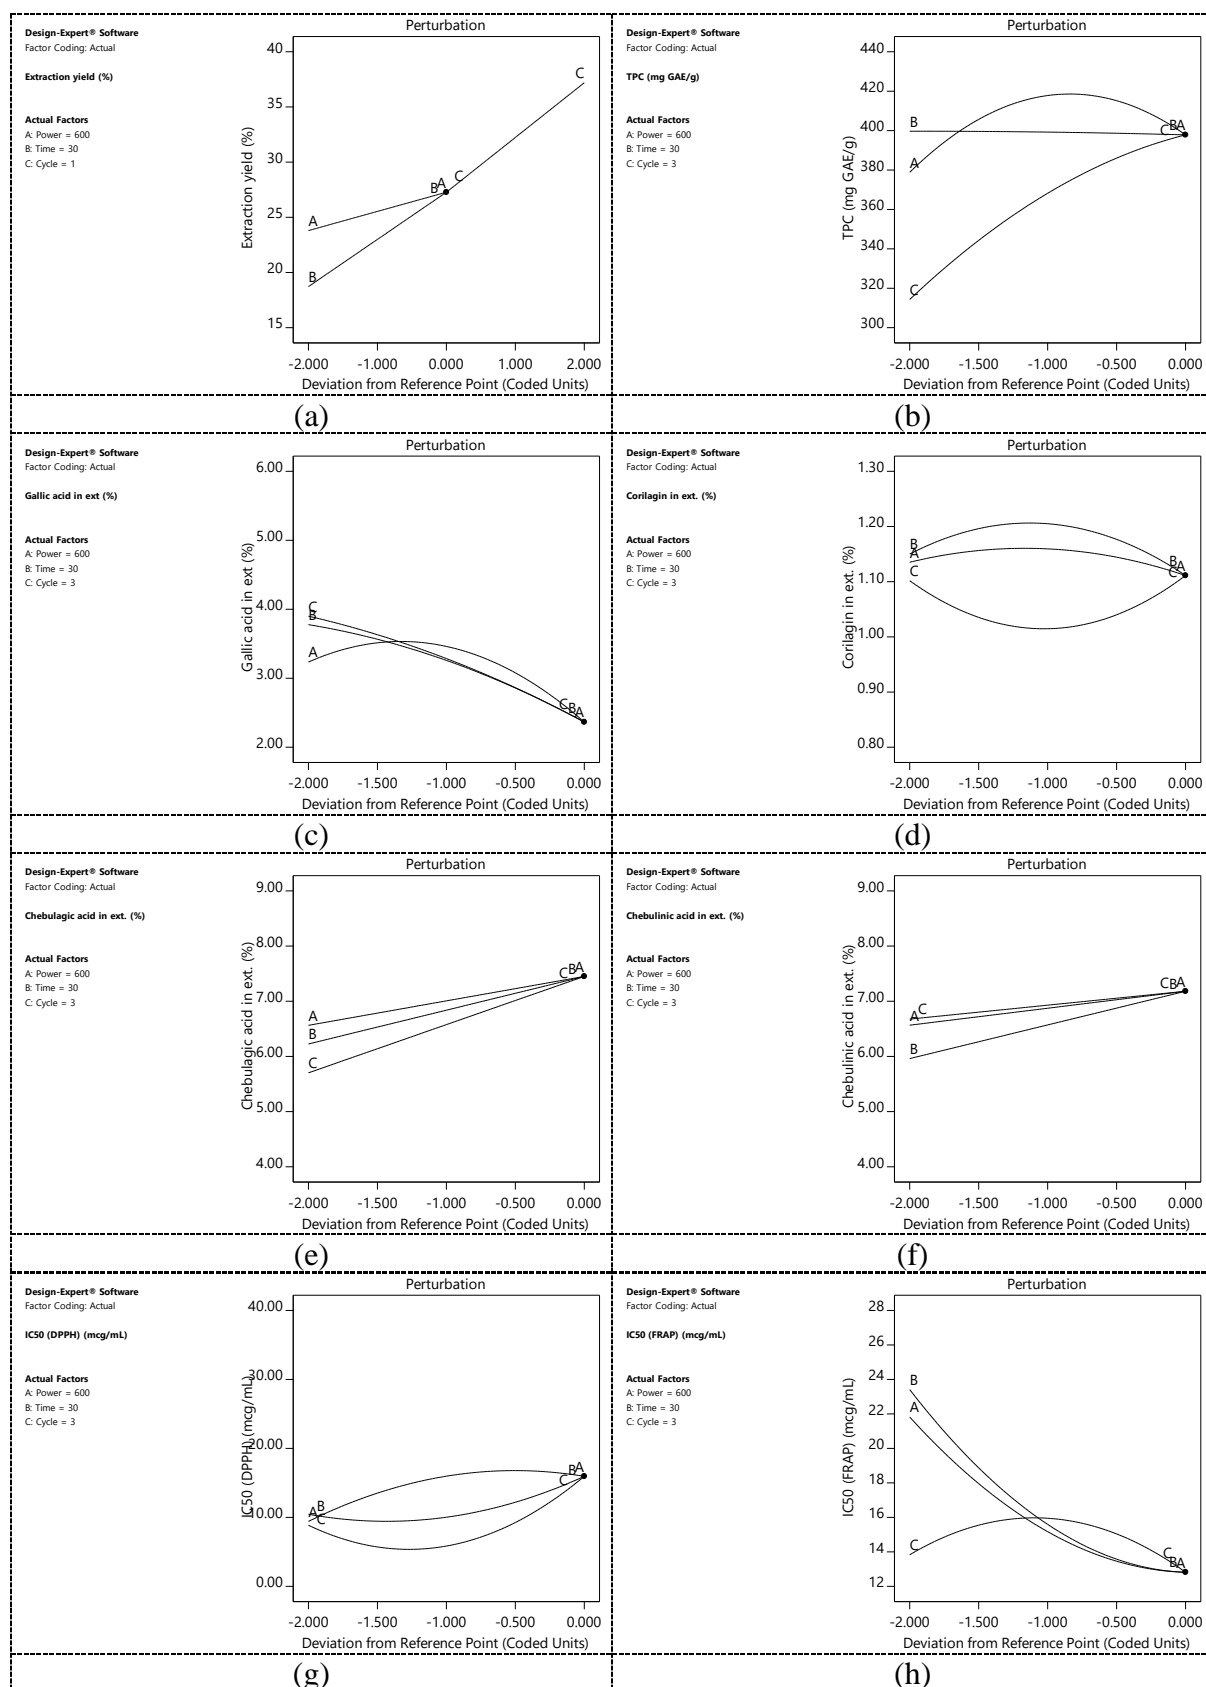

**Figure S1.** Perturbation plots of the Box-Behnken design for microwave-assisted extraction; (a) extraction yield, (b) TPC, (c) gallic acid content, (d) corilagin content, (e) chebulagic acid content, (f) chebulinic acid content, (g) IC<sub>50</sub> from DPPH assay, and (h) IC<sub>50</sub> from FRAP assay.

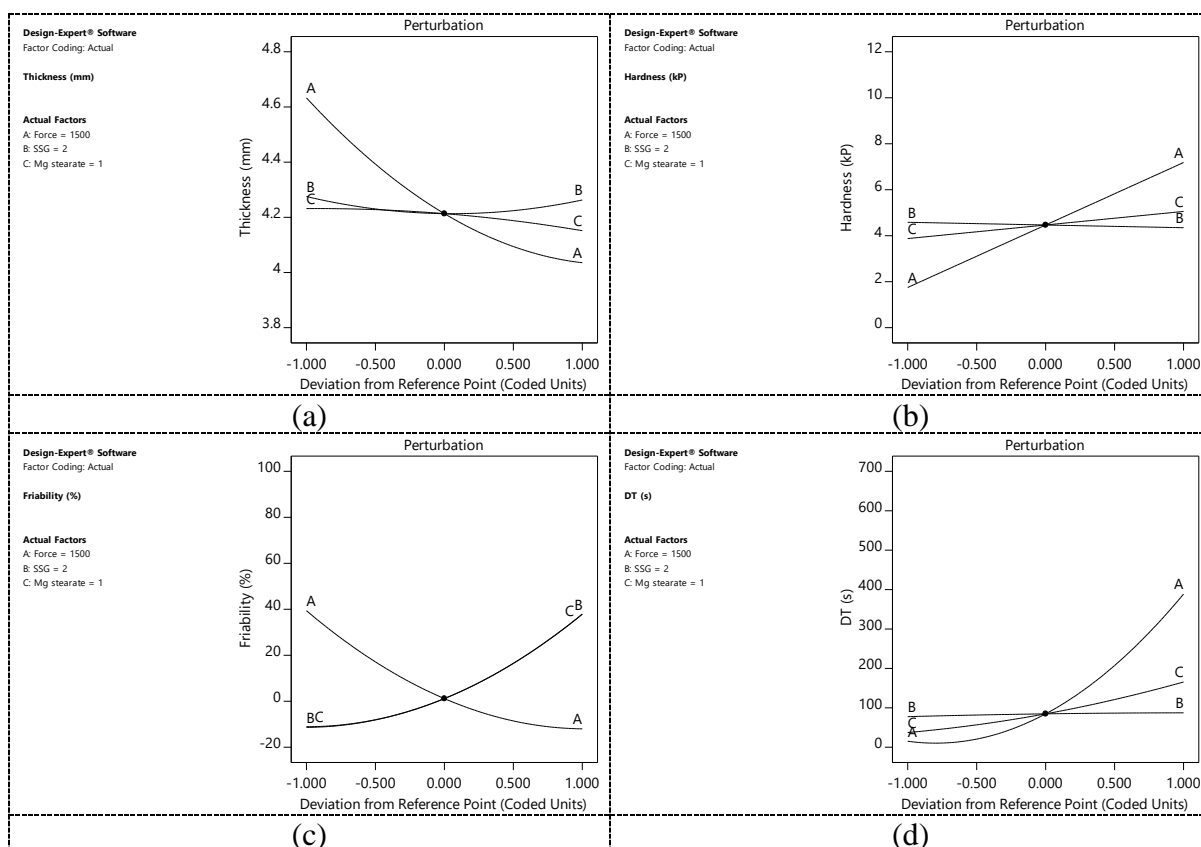

**Figure S2.** Perturbation plots of each response of the Box-Behnken design for tablet fabrication; (a) tablet thickness, (b) hardness, (c) friability, and (d) disintegration time.
